# Supplementary material for: Silver Nanoparticles Coated with Recombinant Human Epidermal Growth Factor: Synthesis, Characterization, Liberation and Anti-Escherichia coli Activity
Source: MDPI journal article supplement (doi:10.3390/reactions4040041), 2023-11-15
Supplement: s1 [file s1]

SUPPORTING INFORMATION FOR THE MANUSCRIPT:

## Silver Nanoparticles Coated with Recombinant Human Epidermal Growth Factor: Synthesis, Characterization, Liberation and Anti-*Escherichia coli* Activity

Layla M. Gonzales Matushita, Luis Palomino and Juan Carlos F. Rodriguez-Reyes \*

Laboratory of Nanoscale and Applications—NASCA, Department of Chemical Engineering, Universidad de Ingeniería y Tecnología—UTEC, Jr. Medrano Silva 165, Barranco, Lima 15063, Peru

\* Correspondence: jcrodriguez@utec.edu.pe

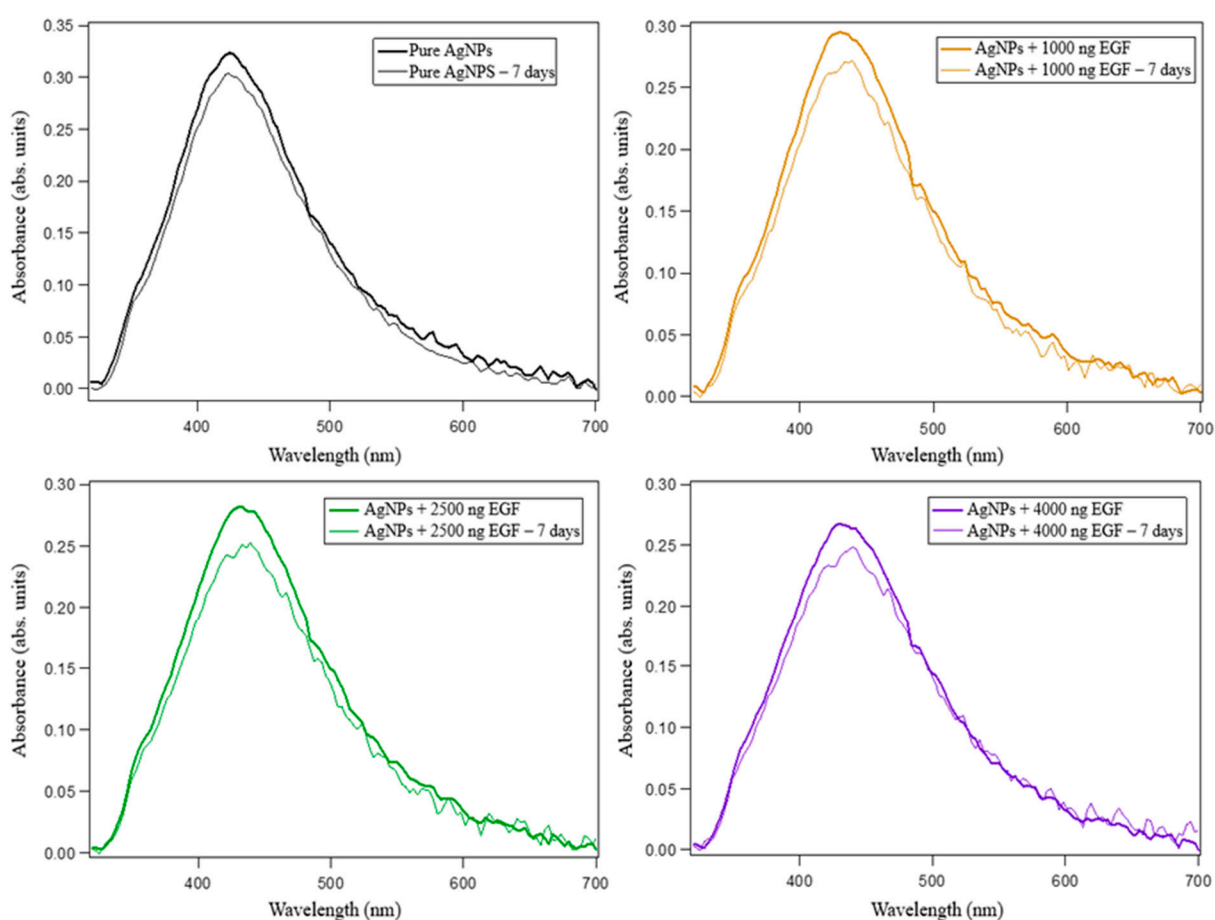

**Figure S1.** UV-Vis spectra of pure AgNPs and 1000 ng, 2500 ng and 4000 ng EGF-coated

AgNPs as synthesized and after seven days, demonstrating the stability of our  
separation/storing methods
